# Supplementary material for: The HPSE Gene Insulator—A Novel Regulatory Element That Affects Heparanase Expression, Stem Cell Mobilization, and the Risk of Acute Graft versus Host Disease
Source: MDPI journal article supplement (doi:10.3390/cells10102523), 2021-09-23
Supplement: s1 [file s1]

Article

# The HPSE Gene Insulator—A Novel Regulatory Element That Affects Heparanase Expression, Stem Cell Mobilization, and the Risk of Acute Graft versus Host Disease

Olga Ostrovsky <sup>1,\*</sup>, Polina Baryakh <sup>1</sup>, Yan Morgulis <sup>1</sup>, Margarita Mayorov <sup>1</sup>, Nira Bloom <sup>1</sup>, Katia Beider <sup>1</sup>, Avichai Shimoni <sup>1</sup>, Israel Vlodavsky <sup>2</sup> and Arnon Nagler <sup>1</sup>

**Table S1.** Characteristics of transplant recipients and donors.

| Variable             | Characteristic                 | No. of cases (%) |
|----------------------|--------------------------------|------------------|
| Age (years)          | Median: 51<br>range: 15–80     |                  |
| Gender               | Recipient:                     |                  |
|                      | male                           | 390 (57.9)       |
|                      | female                         | 284 (42.1)       |
|                      | Donor:                         |                  |
|                      | male                           | 413 (61.3)       |
|                      | female                         | 261 (38.7)       |
| Recipient/Donor      | Male/male                      | 240 (35.6)       |
|                      | Male/female                    | 150 (22.3)       |
|                      | Female/male                    | 173 (25.7)       |
|                      | Female/female                  | 111 (16.5)       |
| Diagnosis            | AML                            | 291 (43.2)       |
|                      | ALL                            | 86 (12.8)        |
|                      | CML                            | 33 (4.9)         |
|                      | CLL                            | 23 (3.4)         |
|                      | MDS                            | 69 (10.2)        |
|                      | HL                             | 17 (2.5)         |
|                      | NHL                            | 86 (12.8)        |
|                      | MM                             | 41 (6.1)         |
|                      | MF                             | 15 (2.2)         |
|                      | AA                             | 13 (1.9)         |
| Donor                | Sibling                        | 365 (54.2)       |
|                      | MUD/mm                         | 309 (45.8)       |
| Conditioning regimen | Myeloablative                  | 384 (57.0)       |
|                      | Reduced-intensity conditioning | 290 (43.0)       |

Abbreviations: ALL, acute lymphoblastic leukemia; AML, acute myeloid leukemia; AA, aplastic anemia; CML, chronic myeloid leukemia; CLL, chronic lymphocytic leukemia; HL, Hodgkin's lymphoma; MDS, myelodysplastic syndrome; MF, myelofibrosis; MM, multiple myeloma; MUD/mm, matched unrelated or mismatched unrelated donor; NHL, Non-Hodgkin's lymphoma; M, male; F, female.

**Table S2.** Primer sequences for insulator cloning and generation of allele-specific probes

| Name              | Modification | Sequence of primers                                                                                                                                                                                                                                                                             | PCR/probe product size, bp |
|-------------------|--------------|-------------------------------------------------------------------------------------------------------------------------------------------------------------------------------------------------------------------------------------------------------------------------------------------------|----------------------------|
| Insulator cloning |              | forward 5' TGTTATCCTGGGGGCATTTA 3'<br>reverse 5' TTGGCTTTGAGCTTTGCTTT 3'                                                                                                                                                                                                                        | 223                        |
| rs4426765 probe   | A → C        | A allele forward:<br>5' [Bln]ATTCATCTTTTTTTTTTTTTTTCACCTCACATGTGA 3'<br>A allele reverse:<br>5' [Bln]TCACATGTGAGGTGAAAAAAAAAAAAAAAAAGATGAAT 3'<br>C allele forward:<br>5' [Bln]ATTCATCTTTTTTTTTTTTTTCCCCTCACATGTGA 3'<br>C allele reverse:<br>5' [Bln]TCACATGTGAGGGGAAAAAAAAAAAAAAAAAGATGAAT 3' | 35<br>35                   |
| rs28649799 probe  | A → G        | A allele forward: 5' [Bln]CATAGCCTGTAGGGGATATCTGTCAAGAATG 3'<br>A allele reverse: 5' [Bln]CATTCTTGACAGATATCCCCTACAGGCTATG-3'<br>G allele forward: 5' [Bln]CATAGCCTGTAGGGGGTATCTGTCAAGAATG 3'<br>G allele reverse: 5' [Bln]CATTCTTGACAGATACCCCCTACAGGCTATG 3'                                    | 31<br>31                   |
| rs4364254 probe   | T → C        | T allele forward: 5' [Bln]AGTTTAAGTATTCTTGGTTATTGTTTCATCC 3'<br>T allele reverse: 5' [Bln]GGATGAACAATAACCAAGAATACTTAAACT 3'<br>C allele forward: 5' [Bln]AGTTTAAGTATTCTTGGTTATCGTTCATCC 3'<br>C allele reverse: 5' [Bln]GGATGAACGATAACCAAGAATACTTAAACT 3'                                       | 30<br>30                   |
